## Medically Challenging Cases

Andrew D. Rosenberg, M.D., Chair  
Committee on Scientific and Educational Exhibits

**T**his will be the fourth year that the Annual Meeting has a section devoted to Medically Challenging Cases. It has become a very popular section with interactive participation by both presenters and viewers. Last year, more than 350 cases were presented. This section provides an opportunity for clinicians to present a difficult case that they have handled. The challenging case format is an excellent forum for a lively educational discussion about a difficult case and a chance for the viewer to suggest how they would have handled the situation. There is still time to submit a medically challenging case for the October meeting in Orlando, as the deadline is **August 4, 2008**. So think about the challenging cases you have had to handle recently and send them in for consideration.

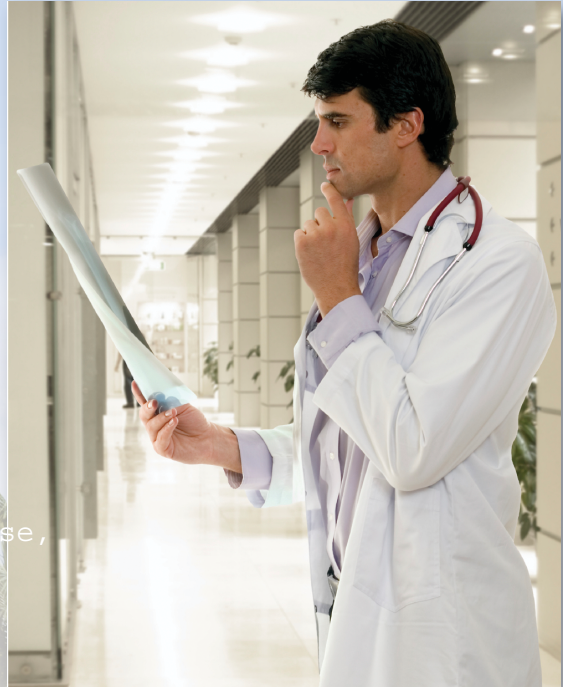

To submit a medically challenging case, access the ASA Web site at [www2.ASAhq.org](http://www2.ASAhq.org) and click on the ? Medically Challenging

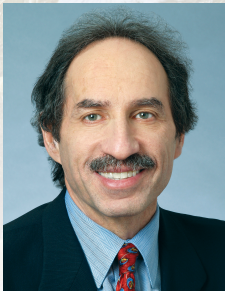

Andrew D. Rosenberg, M.D., is Chair, Department of Anesthesiology, New York University Hospital for Joint Diseases and Professor of Anesthesiology and Orthopedic Surgery, New York University School of Medicine, New York, New York.
